# Supplementary material
Source: PubMed Central journal article supplement (PMC4114307)
Supplement: NIHMS596484-supplement-1.pdf [file NIHMS596484-supplement-1.pdf]

**Supplemental Figure 1: IL-15 regulates the expansion of Eomesodermin<sup>+</sup> αβ T cells.**

Thymocytes from WT, *itk*<sup>-/-</sup>, *il15*<sup>-/-</sup>, and *itk*<sup>-/-</sup>*il15*<sup>-/-</sup> mice were stained with CD1d-tetramer and antibodies to CD4, CD8, TCRδ, TCRβ, HSA (CD24), CD44, and Eomesodermin. Dot-plots show Eomes versus CD44 staining, and graphs show compilations of the percentages and absolute numbers of Eomes<sup>+</sup> cells.

(A) Total thymic cellularity. Significant differences were seen between WT and *itk*<sup>-/-</sup> mice ( $p < 0.005$ ) and between *il15*<sup>-/-</sup> and *itk*<sup>-/-</sup>*il15*<sup>-/-</sup> mice ( $p < 0.05$ ).

(B) Gated on CD8SP TCRβ<sup>high</sup> HSA<sup>low</sup> thymocytes.

(C) Gated on CD4SP TCRδ<sup>neg</sup> TCRβ<sup>high</sup> HSA<sup>low</sup> CD1d-tetramer<sup>neg</sup> thymocytes.

$n = 6-7$  mice per group. Results are from three independent experiments. Statistical analysis performed using a one-way ANOVA. \* $p < 0.05$  \*\* $p < 0.05$  \*\*\* $p < 0.0005$  \*\*\*\* $p < 0.0001$

A) Thymic Cellularity

| Genotype           | WT                                           | Itk KO                                       | MR1 KO                                       | Itk/MR1 DKO                                  |
|--------------------|----------------------------------------------|----------------------------------------------|----------------------------------------------|----------------------------------------------|
| Thymic Cellularity | $1.27 \times 10^8$<br>$\pm 5.23 \times 10^7$ | $7.42 \times 10^7$<br>$\pm 2.14 \times 10^7$ | $1.58 \times 10^8$<br>$\pm 7.62 \times 10^7$ | $7.81 \times 10^7$<br>$\pm 3.70 \times 10^7$ |

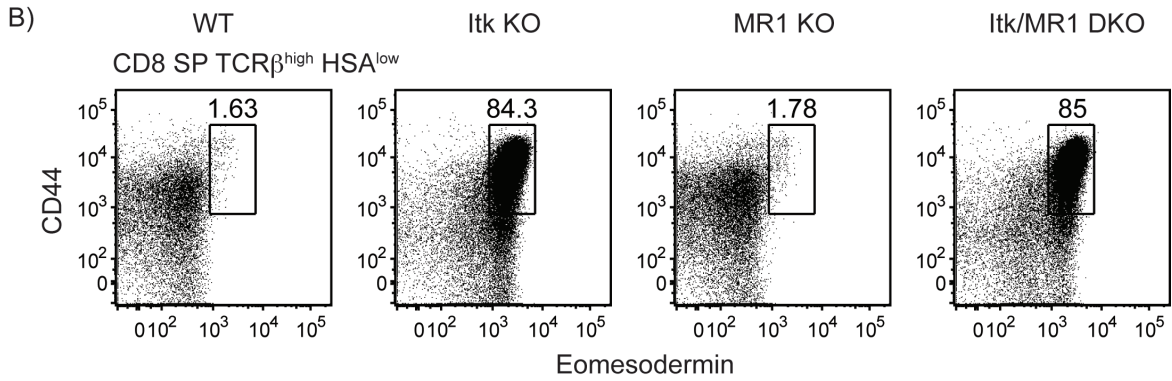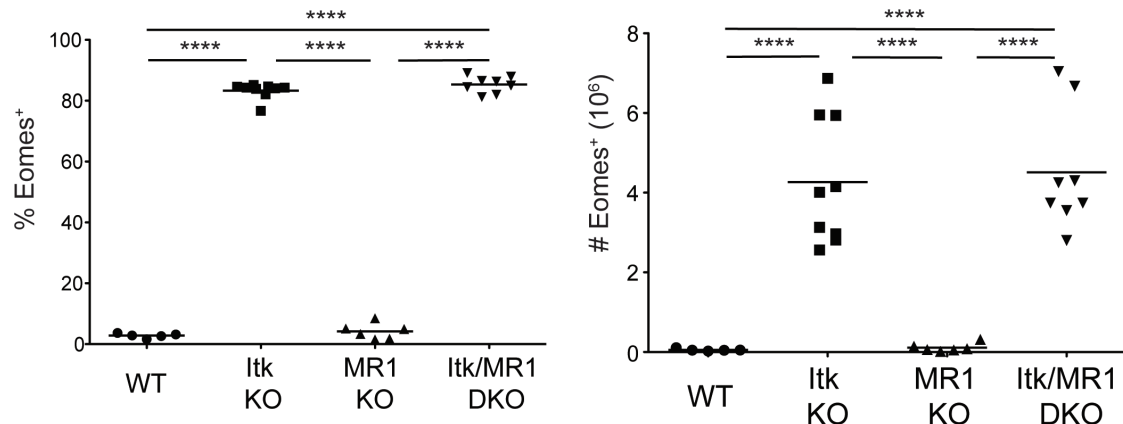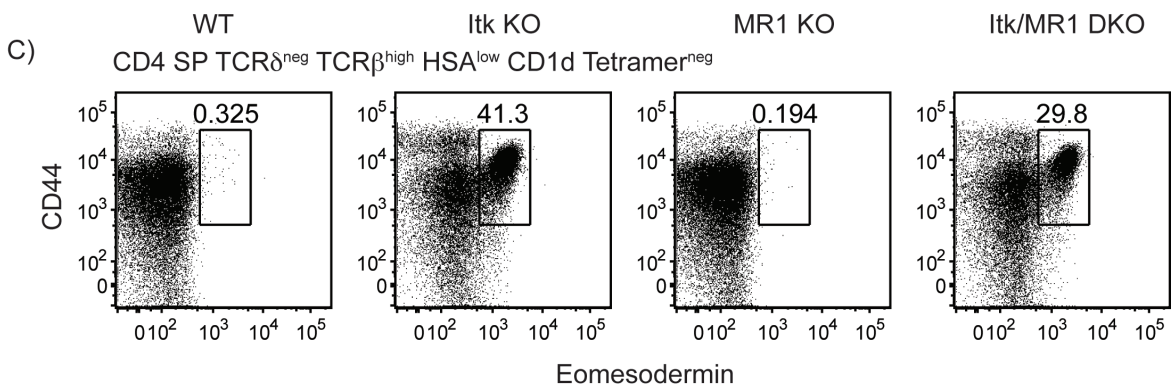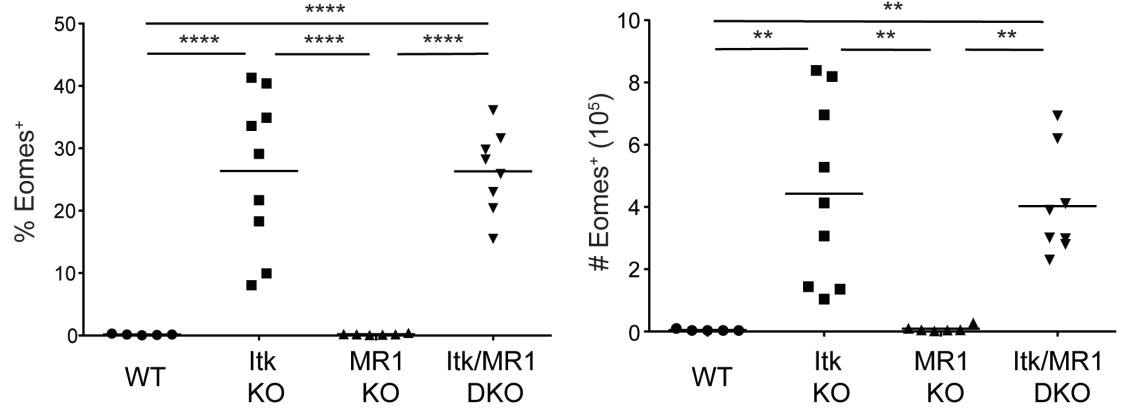

**Supplemental Figure 2: *itk*<sup>-/-</sup> Eomesodermin<sup>+</sup> αβ T cells develop independently of MAIT cells.**

Thymocytes from WT, *itk*<sup>-/-</sup>, *MR1*<sup>-/-</sup>, and *itk*<sup>-/-</sup>*MR1*<sup>-/-</sup> mice were stained with CD1d-tetramer and antibodies to CD4, CD8, TCRδ, TCRβ, HSA, CD44, and Eomesodermin. Dot-plots show Eomes versus CD44 staining, and graphs show compilations of the percentages and absolute numbers of Eomes<sup>+</sup> cells.

(A) Total thymic cellularity. Significant differences were seen between *itk*<sup>-/-</sup> and *MR1*<sup>-/-</sup> mice ( $p < 0.05$ ) and between *MR1*<sup>-/-</sup> and *itk*<sup>-/-</sup>*MR1*<sup>-/-</sup> mice ( $p < 0.05$ ).

(B) Gated on CD8SP TCRβ<sup>high</sup> HSA<sup>low</sup> thymocytes.

(C) Gated on CD4SP TCRδ<sup>neg</sup> TCRβ<sup>high</sup> HSA<sup>low</sup> CD1d-tetramer<sup>neg</sup> thymocytes.

$n = 5-8$  mice per group. Results are representative of three independent experiments. Statistical analysis performed using a one-way ANOVA. \*\* $p < 0.005$  \*\*\*\* $p < 0.0001$

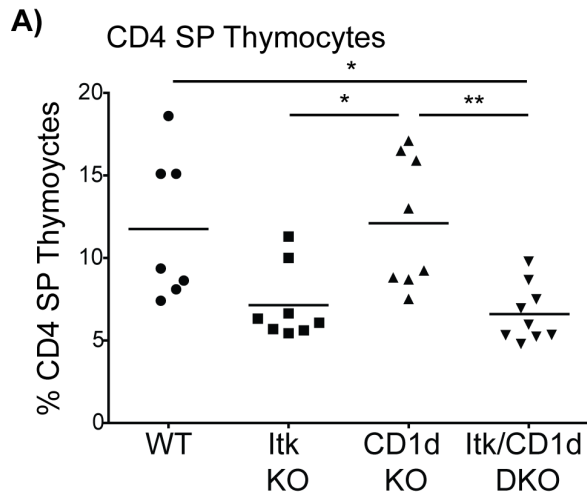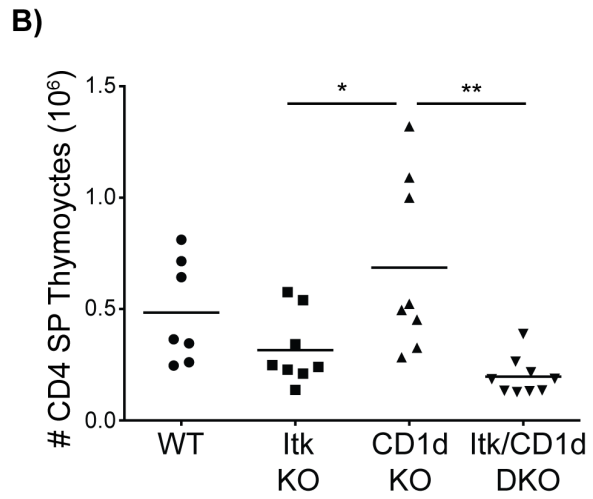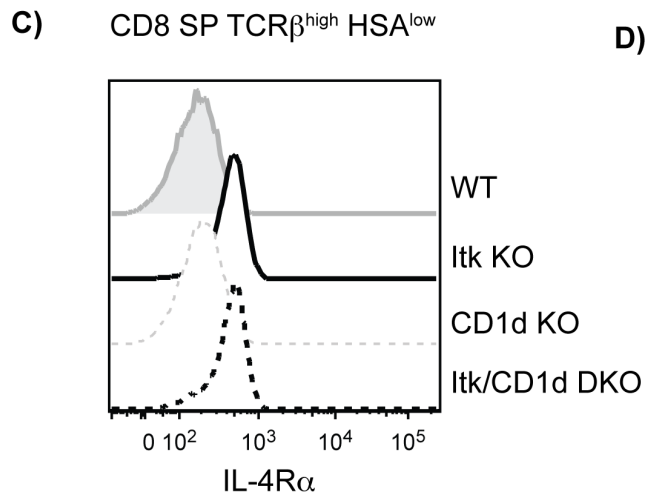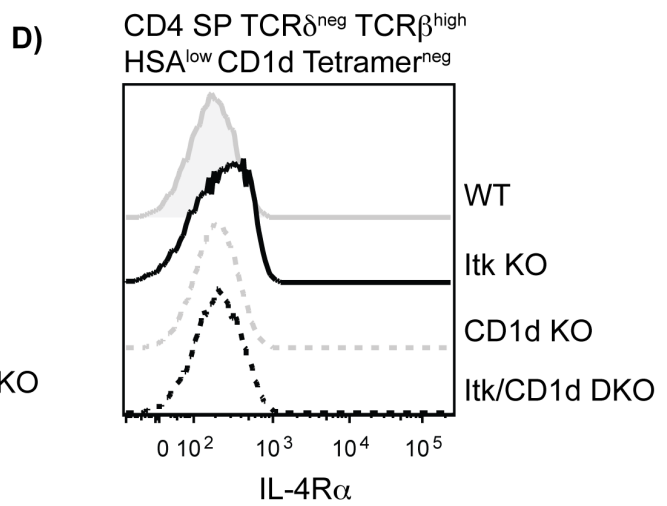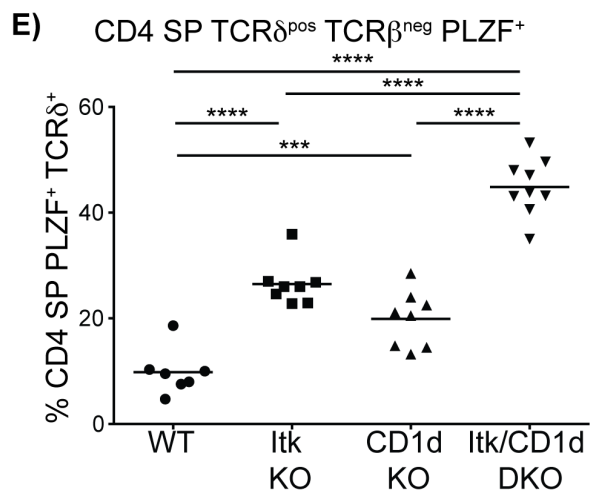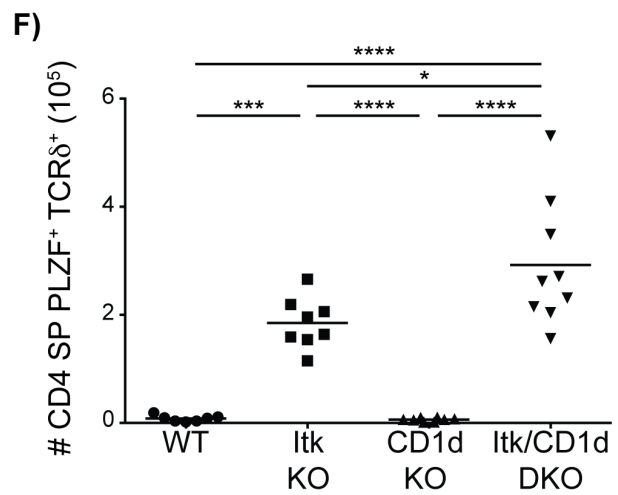

**Supplemental Figure 3:  $\alpha\beta$  NKT cells promote the development of Eomesodermin<sup>+</sup> T cells.**

Thymocytes from WT, *itk*<sup>-/-</sup>, *cd1d*<sup>-/-</sup>, and *itk*<sup>-/-</sup>*cd1d*<sup>-/-</sup> mice were stained with CD1d-tetramer and antibodies against CD4, CD8, TCR $\delta$ , TCR $\beta$ , HSA, IL-4R $\alpha$  (CD124), and Eomesodermin.

(A-B) Graphs show a compilation of four independent experiments indicating the percentage (A) and the number (B) of CD4 SP thymocytes. *n* = 7-9 mice per group.

(C) Histograms of IL-4R $\alpha$  (CD124) expression on mature CD8 SP thymocytes (CD8 SP TCR $\beta$ <sup>high</sup> HSA<sup>low</sup>). Graphs represent one experiment with 2-3 mice per group.

(D) Histograms of IL-4R $\alpha$  (CD124) expression on mature CD4 SP thymocytes (CD4 SP TCR $\delta$ <sup>neg</sup> TCR $\beta$ <sup>high</sup> HSA<sup>low</sup> CD1d-tetramer<sup>neg</sup>). Graphs represent one experiment with 2-3 mice per group.

(E-F) Graphs show a compilation of four independent experiments indicating the percentage (E) and the number (F) of CD4SP TCR $\delta$ <sup>pos</sup> TCR $\beta$ <sup>neg</sup> PLZF<sup>+</sup> ( $\gamma\delta$  NKT) thymocytes. *n* = 7-9 mice per group.

Statistical analysis performed using a one-way ANOVA. \**p* < 0.05 \*\**p* < 0.005 \*\*\**p* < 0.0005

\*\*\*\**p* < 0.0001

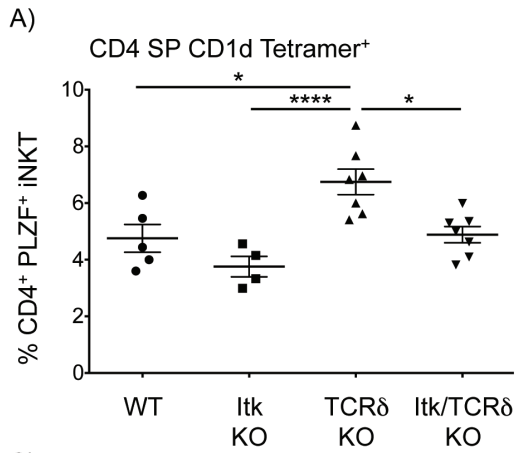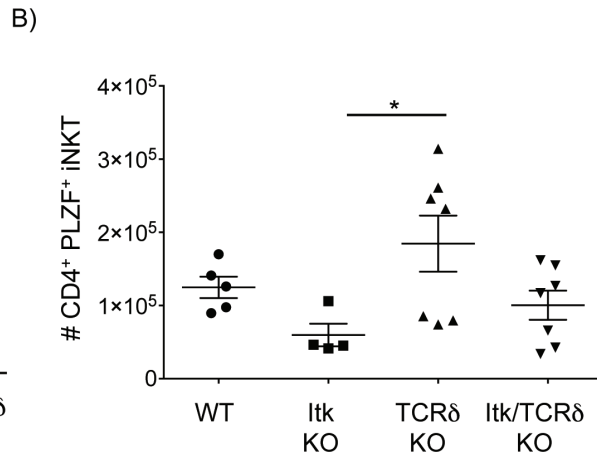

C) Y145F TCRδ<sup>-/-</sup>Y145F

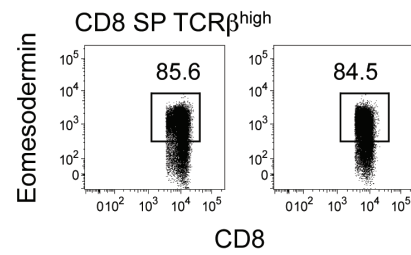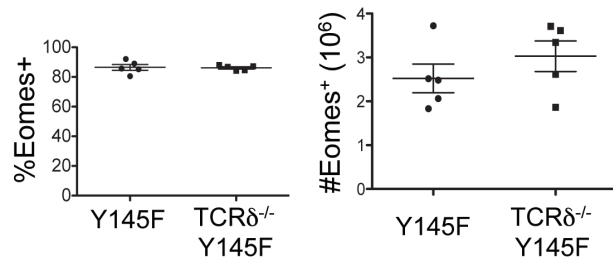

D) Y145F TCRδ<sup>-/-</sup>Y145F

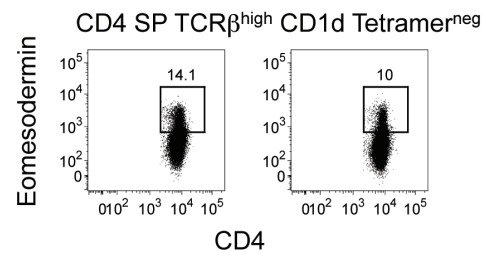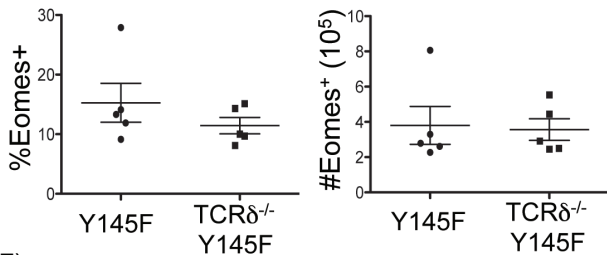

E)

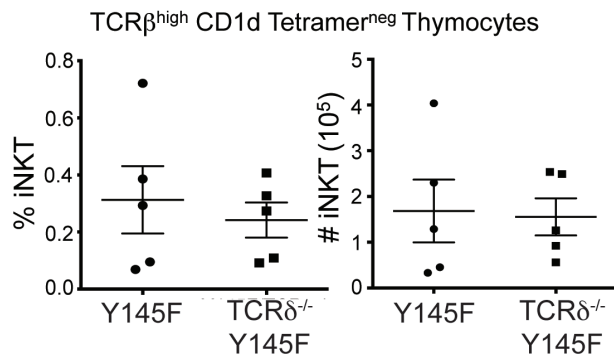

F)

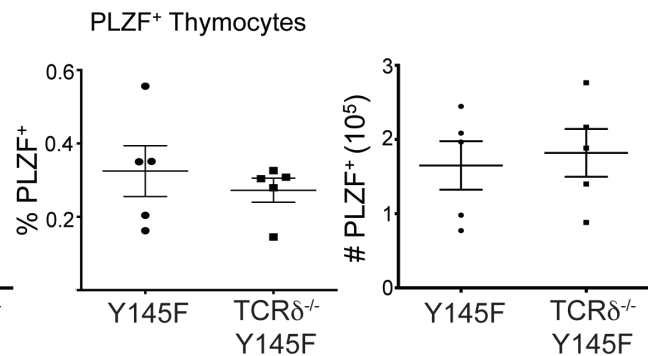

**Supplemental Figure 4: Eomesodermin<sup>+</sup> T cells develop independently of  $\gamma\delta$  T cells.**

(A-B) Thymocytes from WT, *itk*<sup>-/-</sup>, *tcrd*<sup>-/-</sup>, and *itk*<sup>-/-</sup>*tcrd*<sup>-/-</sup> mice were stained with CD1d-tetramer and antibodies to CD4 and CD8. Graphs show compilations of the percentages (A) and absolute numbers (B) of  $\alpha\beta$  iNKT cells that are gated on CD4 SP CD1d-tetramer<sup>+</sup> thymocytes.

*n* = 4-7 mice per group. Results are representative of two independent experiments. Statistical analysis was performed using a one-way ANOVA. \**p* < 0.05, \*\*\*\**p* < 0.0001

(C-F) Thymocytes from SLP-76(Y145F) and SLP-76(Y145F)*tcrd*<sup>-/-</sup> mice were stained with a cell viability dye, CD1d-tetramer, and antibodies to CD4, CD8, TCR $\beta$ , and Eomesodermin. *n* = 5 mice per group. Results are representative of two independent experiments. Statistical significance was analyzed in GraphPad Prism using a student's t test.

Dot-plots show (C) Eomes versus CD8 staining or (D) Eomes versus CD4, and graphs show compilations of the percentages and absolute numbers of Eomes<sup>+</sup> cells.

(C) Gated on CD8SP TCR $\beta$ <sup>high</sup> thymocytes.

(D) Gated on CD4SP TCR $\beta$ <sup>high</sup> CD1d-tetramer<sup>neg</sup> thymocytes.

(E) Graphs show the frequency (right) and number (left) of  $\alpha\beta$  iNKT cells (Gated on live thymocytes that are TCR $\beta$ <sup>high</sup> and CD1d-tetramer<sup>pos</sup>).

(F) Graphs show the frequency (right) and number (left) of total CD4<sup>+</sup> PLZF<sup>+</sup> thymocytes (Gated on live PLZF<sup>+</sup> thymocytes).
